# Supplementary material for: Marine Natural Compound (Neviotin A) Displays Anticancer Efficacy by Triggering Transcriptomic Alterations and Cell Death in MCF-7 Cells
Source: MDPI journal article supplement (doi:10.3390/molecules28176289), 2023-08-28
Supplement: s1 [file s1]

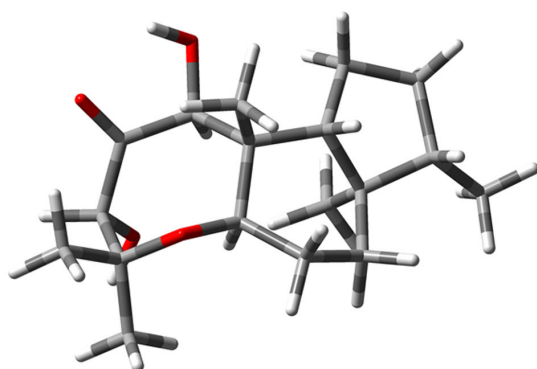

C1: 52%

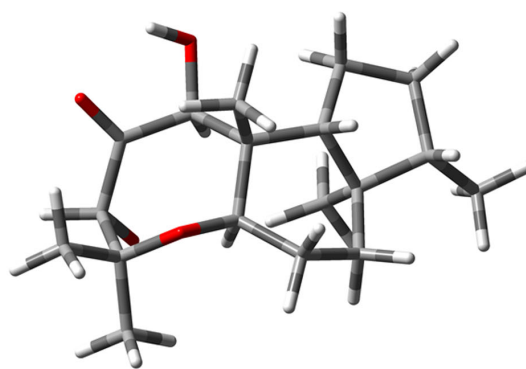

C2: 48%

**Figure S1.** Two dominant conformers of Neviotin A obtained with population of 52 and 48%. Population of the conformers obtained at wb97xd/6-31g(d,p)/CPCM/ acetonitrile.

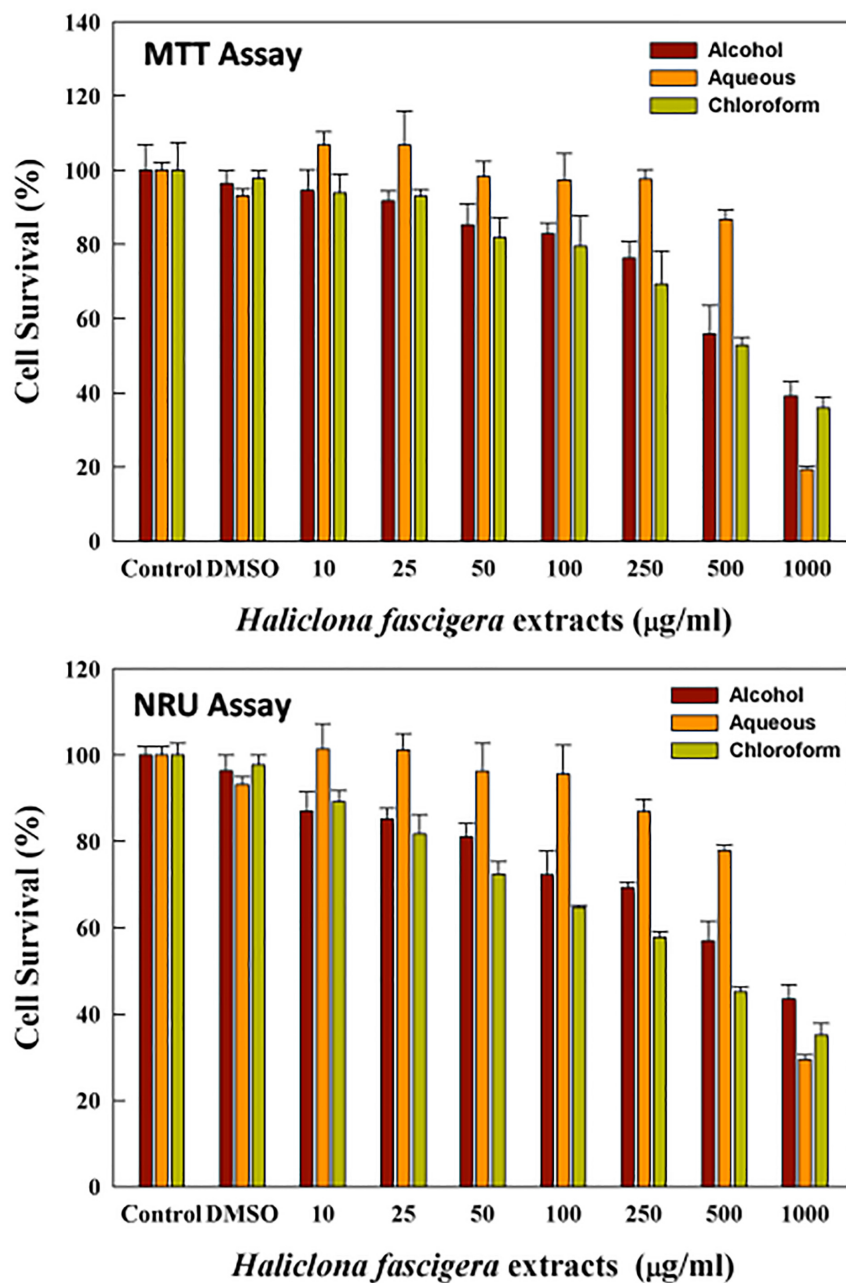

**Figure S2.** *Haliclona fascigera* extracts declined the survival of MCF-7. Screening of *Haliclona fascigera* extracts on cell proliferation of MCF-7 cells after 24h. Different extracts ethanol (alcohol), water (aqueous), chloroform (sample C) showed varying level of cell survival reduction in MCF-7 analyzed by MTT and NRU assays. Each histogram is the mean  $\pm$  SD of three experiments done in triplicate wells.

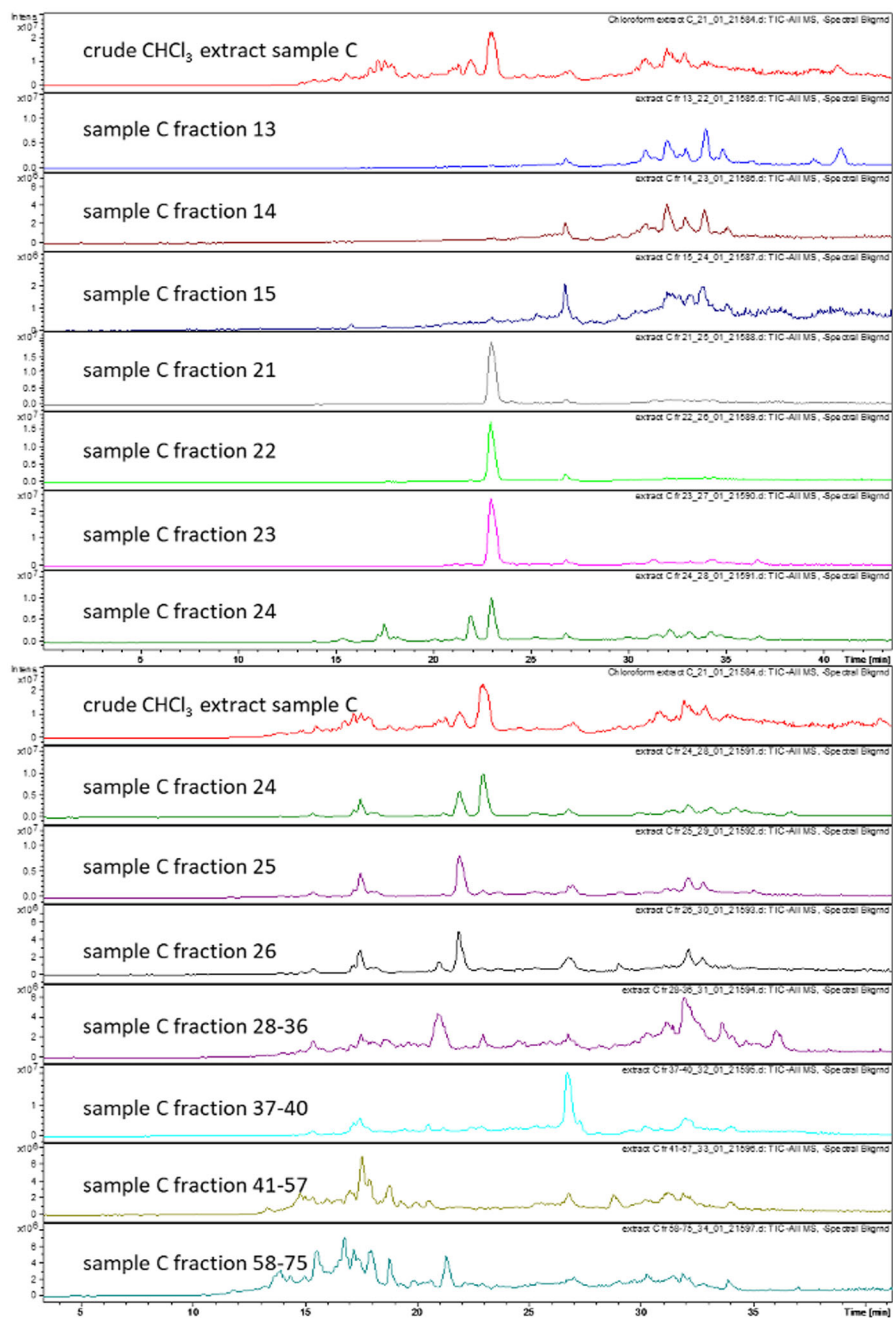

**Figure S3.** Bioassay guided fractionation of sample C. TIC of the LC-MS analysis (ESI, negative modus) of sample C (5 mg/ml) and selected subfractions of sample C (each 1 mg/ml). For analytical conditions, see section 4.3.

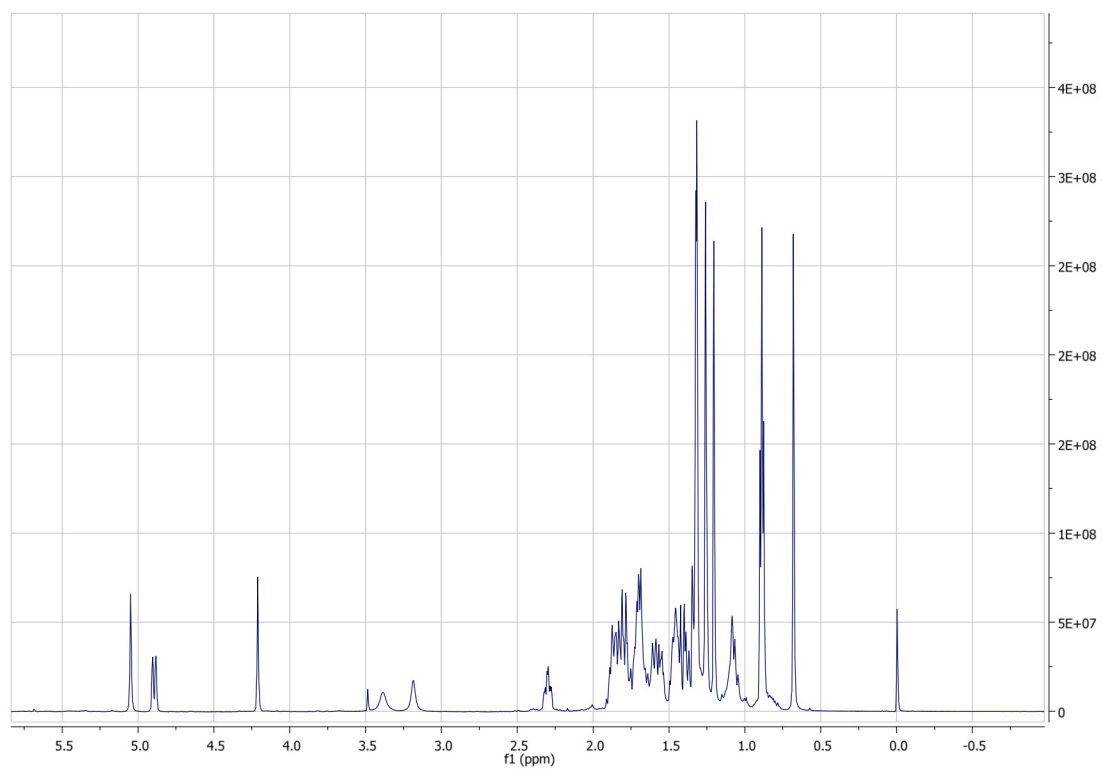

**Figure S4.**  $^1\text{H}$ -NMR of Neviotin A.  $^1\text{H}$ -NMR-spectrum measured in  $\text{CDCl}_3$ .



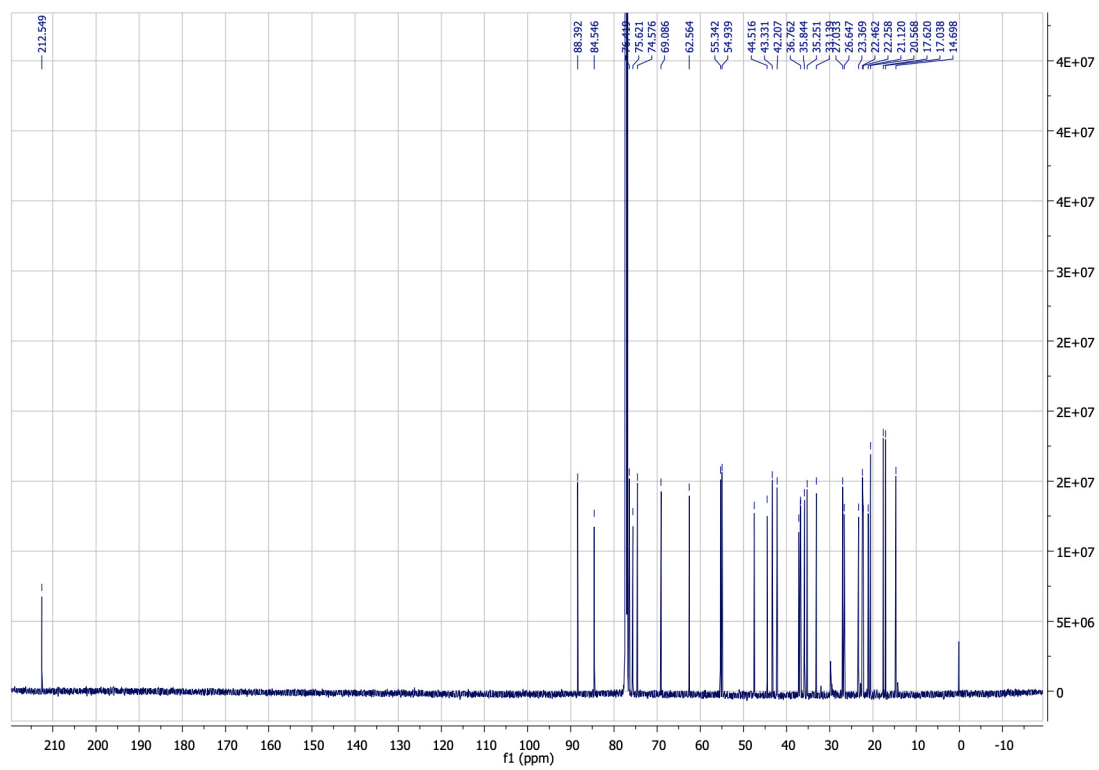

**Figure S5.**  $^{13}\text{C}$  Carbon NMR of Neviotin A.  $^{13}\text{C}$  Carbon NMR spectrum measured in  $\text{CDCl}_3$ .

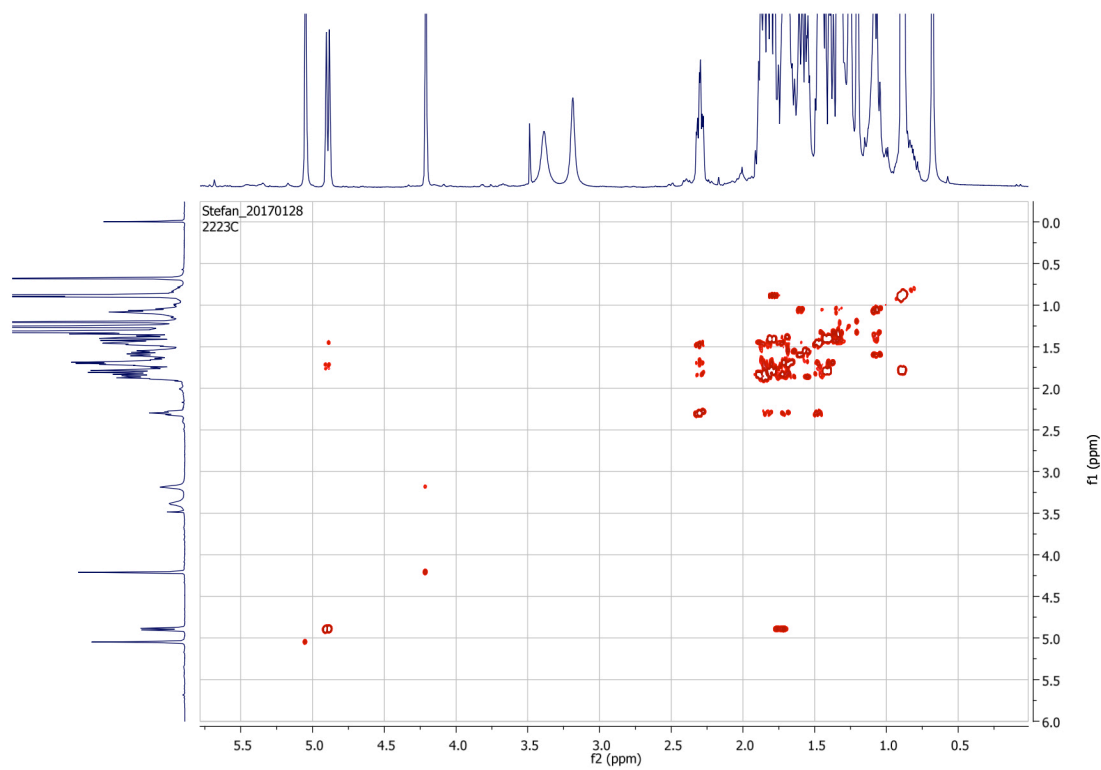

**Figure S6.** Neviotin A structure analysis by NMR. COSY-spectrum measured in CDCl<sub>3</sub>.

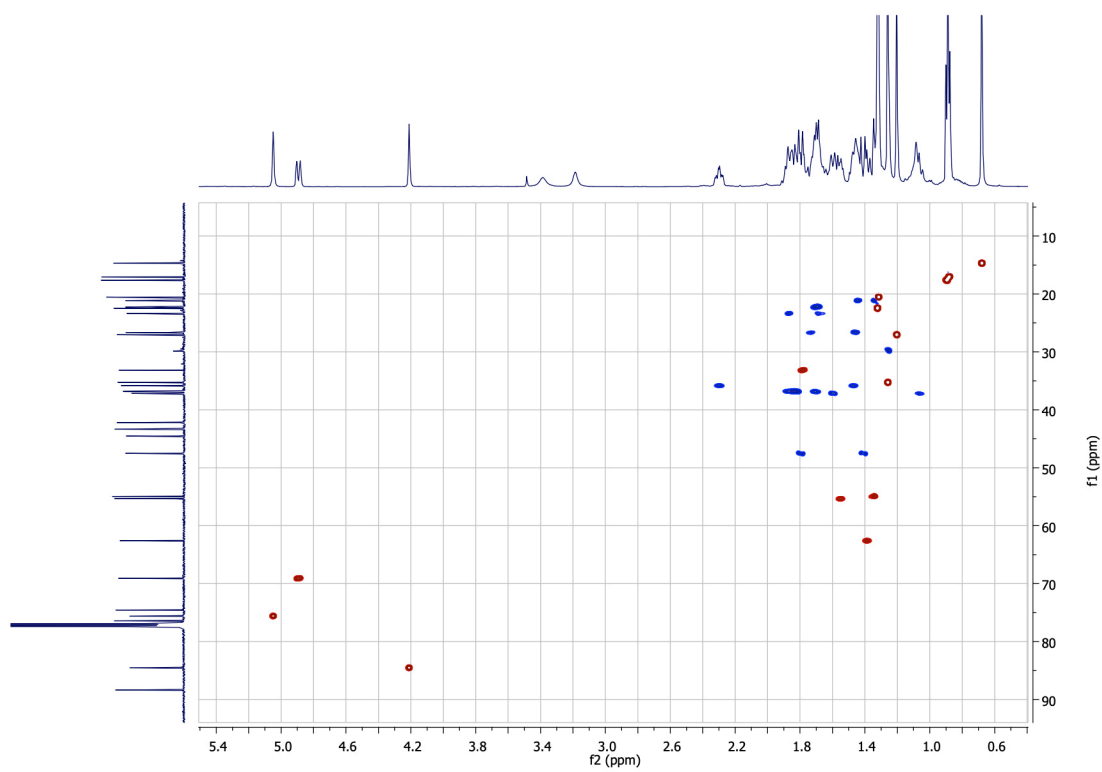

**Figure S7.** Neviotin A structure analysis by NMR. Heteronuclear Single Quantum Coherence (HSQC)-spectrum measured in  $\text{CDCl}_3$ .

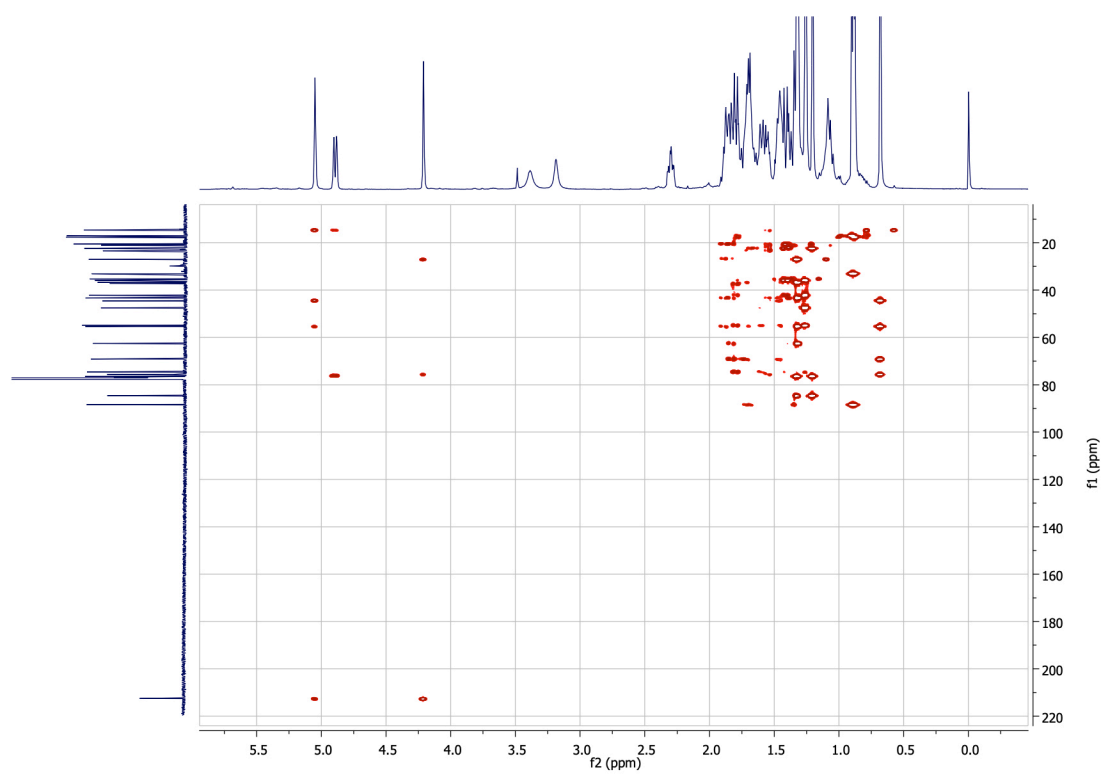

**Figure S8.** Neviotin A structure analysis by NMR. Heteronuclear Multiple Bond Correlation (HMBC)-spectrum measured in CDCl<sub>3</sub>.

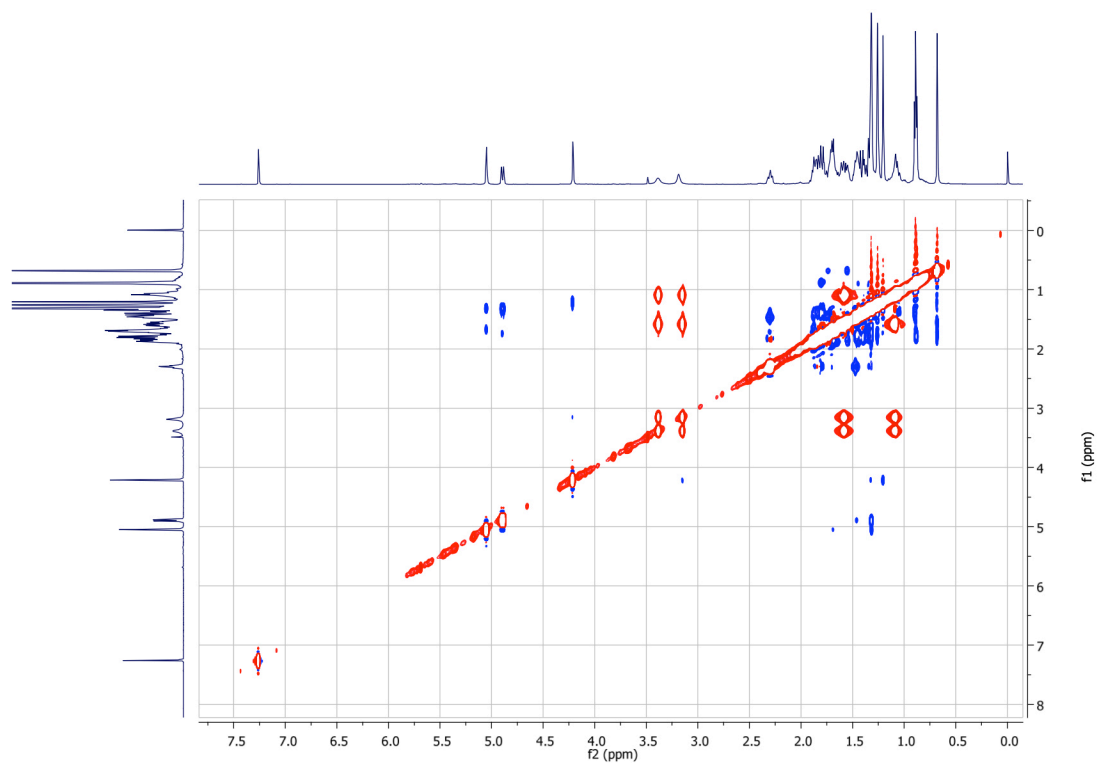

**Figure S9.** Neviotin A structure analysis by NMR. Nuclear Overhauser Effect Spectroscopy (NOESY)-spectrum in  $\text{CDCl}_3$ .

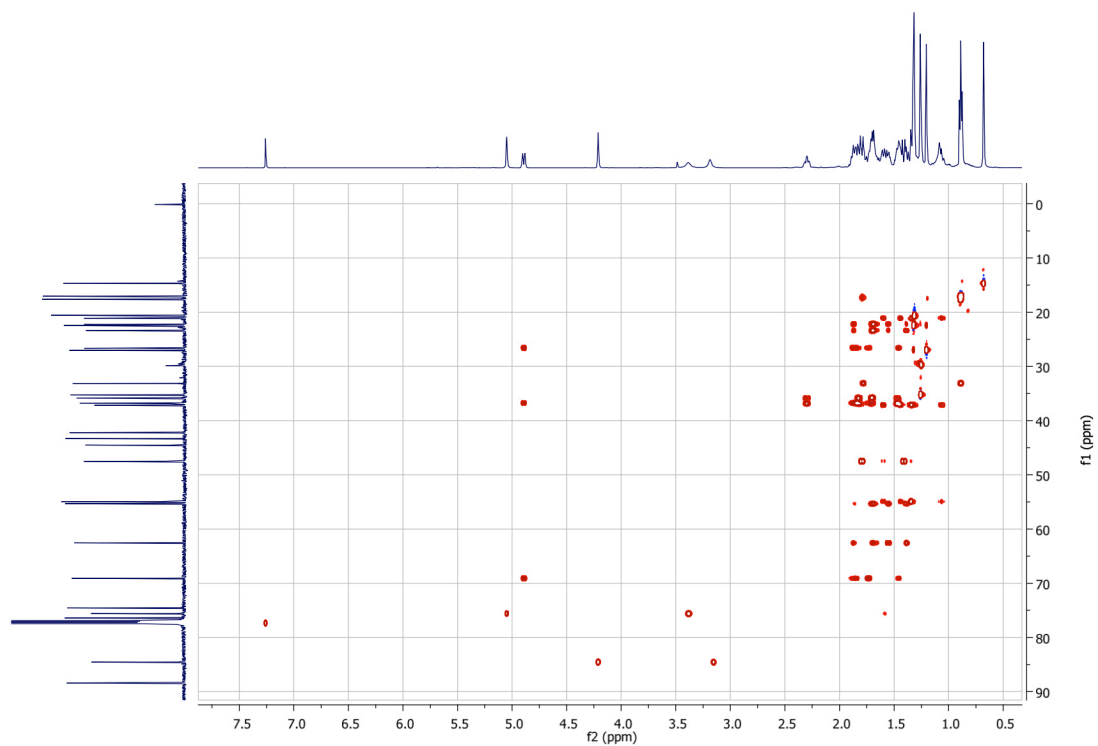

**Figure S10.** Neviotin A structure analysis by NMR. Heteronuclear Single Quantum Coherence Total Correlation Spectroscopy (HSQC-TOCSY)-spectrum in CDCl<sub>3</sub>.

**Table S1.**  $^1\text{H}$  and  $^{13}\text{C}$  NMR data of Neviotin A. NMR data of Neviotin A measured in  $\text{CDCl}_3$  or  $\text{DMSO}-d_6$ .

| Position | $^1\text{H}$ NMR (600 MHz, $\text{CDCl}_3$ )       | $^1\text{H}$ NMR (600 MHz, $\text{DMSO}-d_6$ ) | $^{13}\text{C}$ NMR (151 MHz, $\text{CDCl}_3$ ) $\delta_{\text{C}}$ in ppm | $^{13}\text{C}$ NMR (151 MHz, $\text{DMSO}-d_6$ ) $\delta_{\text{C}}$ in ppm |
|----------|----------------------------------------------------|------------------------------------------------|----------------------------------------------------------------------------|------------------------------------------------------------------------------|
| 2        | ---                                                | ---                                            | 76.4                                                                       | 75.6                                                                         |
| 3        | 4.21 <i>s</i> , 1H                                 | 3.94 <i>d</i> (4.6), 1H                        | 84.6                                                                       | 83.5                                                                         |
| 3-OH     | 3.19 <i>br s</i> , 1H                              | 6.15 <i>d</i> (4.6), 1H                        | ---                                                                        | ---                                                                          |
| 4        | ---                                                | ---                                            | 212.6                                                                      | 213.3                                                                        |
| 5        | 5.05 <i>s</i> , 1H                                 | 4.94 <i>d</i> (7.2), 1H                        | 75.6                                                                       | 74.7                                                                         |
| 5-OH     | 3.39 <i>br s</i> , 1H                              | 4.05 <i>d</i> (7.2), 1H                        |                                                                            |                                                                              |
| 6        | ---                                                | ---                                            | 44.5                                                                       | 43.3                                                                         |
| 7        | 4.90 <i>br dd</i> (12.9; 2.7), 1H                  | 4.85 <i>dd</i> (13.0; 3.0), 1H                 | 69.1                                                                       | 68.1                                                                         |
| 8        | Ha 1.73 <i>m</i> ,<br>Hb 1.46 <i>m</i>             | Ha 1.58 <i>m</i> ,<br>Hb 1.27 <i>m</i>         | 26.7                                                                       | 26.4                                                                         |
| 9        | 1.84 <i>m</i> , 2H                                 | 1.73 <i>m</i> , 2H                             | 36.8                                                                       | 36.5                                                                         |
| 10       | ---                                                | ---                                            | 43.3                                                                       | 41.8                                                                         |
| 11       | 1.58 <i>m</i> , 1H                                 | 1.39 <i>dd</i> (12.9, 7.2), 1H                 | 55.3                                                                       | 55.1                                                                         |
| 12       | Ha 1.87 <i>m</i> ,<br>Hb 1.69 <i>m</i>             | Ha 1.66 <i>m</i> ,<br>Hb 1.59 <i>m</i>         | 23.4                                                                       | 23.1                                                                         |
| 13       | Ha 1.44 <i>m</i> ,<br>Hb 1.35 <i>m</i>             | Ha 1.73 <i>m</i> ,<br>Hb 1.49 <i>m</i>         | 21.1                                                                       | 21.6                                                                         |
| 14       | 1.38 <i>m</i> , 1H                                 | 1.24 <i>m</i> , 1H                             | 62.6                                                                       | 62.4                                                                         |
| 15       | ---                                                | ---                                            | 74.6                                                                       | 72.7                                                                         |
| 15-OH    |                                                    | 3.26 <i>s</i> , 1H                             |                                                                            |                                                                              |
| 16       | Ha 1.59 <i>m</i> ,<br>Hb 1.06 <i>m</i>             | Ha 1.49 <i>m</i> ,<br>Hb 0.96 <i>m</i>         | 37.2                                                                       | 36.6                                                                         |
| 17       | 1.70 <i>m</i> , 2H                                 | 1.27 <i>m</i> , 2H                             | 22.3                                                                       | 20.8                                                                         |
| 18       | 1.34 <i>m</i> , 1H                                 | 1.29 <i>m</i> , 1H                             | 54.9                                                                       | 53.6                                                                         |
| 19       | ---                                                | ---                                            | 88.4                                                                       | 86.2                                                                         |
| 19-OH    |                                                    | 3.46 <i>s</i> , 1H                             |                                                                            |                                                                              |
| 20       | Ha 1.84 <i>m</i> ,<br>Hb 1.70 <i>m</i>             | 1.60 <i>m</i> , 2H                             | 36.9                                                                       | 36.1                                                                         |
| 21       | Ha 2.30 <i>td</i> (12.1; 4.9),<br>Hb 1.47 <i>m</i> | Ha 2.37 <i>m</i> ,<br>Hb 1.27 <i>m</i>         | 35.8                                                                       | 35.3                                                                         |
| 22       | ---                                                | ---                                            | 42.2                                                                       | 42.6                                                                         |

|    |                                        |                                        |      |      |
|----|----------------------------------------|----------------------------------------|------|------|
| 23 | Ha 1.79 <i>m</i> ,<br>Hb 1.41 <i>m</i> | Ha 1.67 <i>m</i> ,<br>Hb 1.26 <i>m</i> | 47.5 | 47.0 |
| 24 | 1.21 <i>s</i> , 3H                     | 1.04 <i>s</i> , 3H                     | 27.0 | 26.7 |
| 25 | 1.32 <i>s</i> , 3H                     | 1.17 <i>s</i> , 3H                     | 22.5 | 22.4 |
| 26 | 0.68 <i>s</i> , 3H                     | 0.56 <i>s</i> , 3H                     | 14.7 | 15.3 |
| 27 | 1.32 <i>s</i> , 3H                     | 1.19 <i>s</i> , 3H                     | 20.6 | 20.0 |
| 28 | 1.78 <i>m</i> , 1H                     | 1.62 <i>m</i> , 1H                     | 33.1 | 32.9 |
| 29 | 0.90 <i>d</i> (7.2),<br>3H             | 0.80 <i>d</i> (6.1),<br>3H             | 17.6 | 17.2 |
| 30 | 0.88 <i>d</i> (7.2),<br>3H             | 0.79 <i>d</i> (6.1),<br>3H             | 17.0 | 17.8 |
| 31 | 1.26 <i>s</i> , 3H                     | 1.20 <i>s</i> , 3H                     | 35.3 | 35.3 |



**Table S2.** List of upregulated (red text) and downregulated (green text) genes in MCF-7 cells exposed to sample C and Neviotin A analysed by qPCR array experiment.

### Sample C

| Gene Symbol | Plate Position | Fold Regulation |
|-------------|----------------|-----------------|
| AKT1        | A03            | 1.22            |
| BAX         | A09            | 1.32            |
| BCL2L1      | B01            | 1.3             |
| BCL2L2      | B04            | 3.16            |
| BIRC5       | B10            | 8.34            |
| CD70        | D06            | 1.78            |
| CRADD       | D10            | 1.47            |
| CYCS        | D11            | 1.22            |
| DIABLO      | E02            | 1.35            |
| IGF1R       | E08            | 1.39            |
| LTBR        | E11            | 1.35            |
| TNFRSF10B   | F09            | 1.39            |
| TNFRSF1B    | F12            | 1.52            |
| TNFRSF21    | G01            | 1.72            |
| ABL1        | A01            | -1.48           |
| BAG3        | A07            | -1.42           |
| BCL2A1      | A12            | -1.54           |
| BID         | B06            | -1.35           |
| CASP2       | C07            | -1.23           |
| CASP6       | C11            | -1.44           |
| FADD        | E03            | -1.37           |
| FAS         | E04            | -1.31           |
| NFKB1       | F02            | -1.21           |
| NOL3        | F04            | -1.62           |
| TNFRSF1A    | F11            | -12.38          |
| TP73        | G08            | -1.27           |

### Neviotin A

| Gene Symbol | Plate Position | Fold Regulation |
|-------------|----------------|-----------------|
| ABL1        | A01            | 4.44            |
| AIFM1       | A02            | 1.66            |
| BAG3        | A07            | 5.82            |
| BAK1        | A08            | 2.97            |
| BCL2A1      | A12            | 5.62            |
| BCL2L10     | B02            | 8.17            |
| BCL2L11     | B03            | 3.34            |
| BID         | B06            | 3.30            |
| BIRC2       | B08            | 1.30            |
| BIRC3       | B09            | 2.21            |
| BIRC5       | B10            | 8.35            |
| BIRC6       | B11            | 1.80            |
| BRAF        | C03            | 1.63            |
| CASP1       | C04            | 11.24           |
| CASP10      | C05            | 3.14            |
| CASP4       | C09            | 1.39            |
| CASP7       | C12            | 4.66            |
| CASP9       | D02            | 4.32            |
| CD27        | D03            | 13.75           |
| CD40LG      | D05            | 6.46            |
| CIDEA       | D08            | 13.56           |
| CYCS        | D11            | 9.01            |
| DFFA        | E01            | 25.30           |
| FAS         | E04            | 8.70            |
| GADD45A     | E06            | 2.18            |
| HRK         | E07            | 2.38            |
| IL10        | E09            | 2.27            |
| LTA         | E10            | 7.90            |
| NOD1        | F03            | 2.07            |
| PYCARD      | F05            | 2.97            |
| RIPK2       | F06            | 1.71            |
| TNFRSF10A   | F08            | 1.59            |
| TNFRSF11B   | F10            | 16.24           |
| TNFSF10     | G04            | 9.20            |
| TNFSF8      | G05            | 3.12            |
| TP53BP2     | G07            | 1.55            |
| TP73        | G08            | 2.57            |
| TRADD       | G09            | 1.68            |
| TRAF3       | G11            | 6.50            |

  

|           |     |       |
|-----------|-----|-------|
| AKT1      | A03 | -7.62 |
| APAF1     | A04 | -2.08 |
| BAD       | A05 | -7.25 |
| BAX       | A09 | -4.62 |
| BCL2      | A11 | -2.28 |
| BCL2L1    | B01 | -5.69 |
| BNIP2     | B12 | -1.33 |
| BNIP3     | C01 | -1.66 |
| BNIP3L    | C02 | -1.24 |
| CASP2     | C07 | -2.79 |
| CD40      | D04 | -1.41 |
| CD70      | D06 | -1.35 |
| CIDEB     | D09 | -2.99 |
| DAPK1     | D12 | -5.85 |
| DIABLO    | E02 | -2.55 |
| FADD      | E03 | -4.05 |
| IGF1R     | E08 | -5.42 |
| LTBR      | E11 | -4.66 |
| NFKB1     | F02 | -2.25 |
| TNF       | F07 | -2.83 |
| TNFRSF10B | F09 | -1.42 |
| TNFRSF1A  | F11 | -4.53 |
| TNFRSF1B  | F12 | -2.53 |
| TNFRSF21  | G01 | -2.39 |
| TNFRSF25  | G02 | -1.56 |
| TRAF2     | G10 | -5.02 |
| XIAP      | G12 | -1.26 |

**Figure S11.** Bioinformatic analysis depicting alterations in the miRNAs-gene network map derived from qPCR array data. (A) miRNAs targeting the upregulated (red) and downregulated (green) genes in sample C treated MCF-7 cells. (B) miRNAs targeting the upregulated (red) and downregulated (green) genes in Neviotin A treated MCF-7 cells.

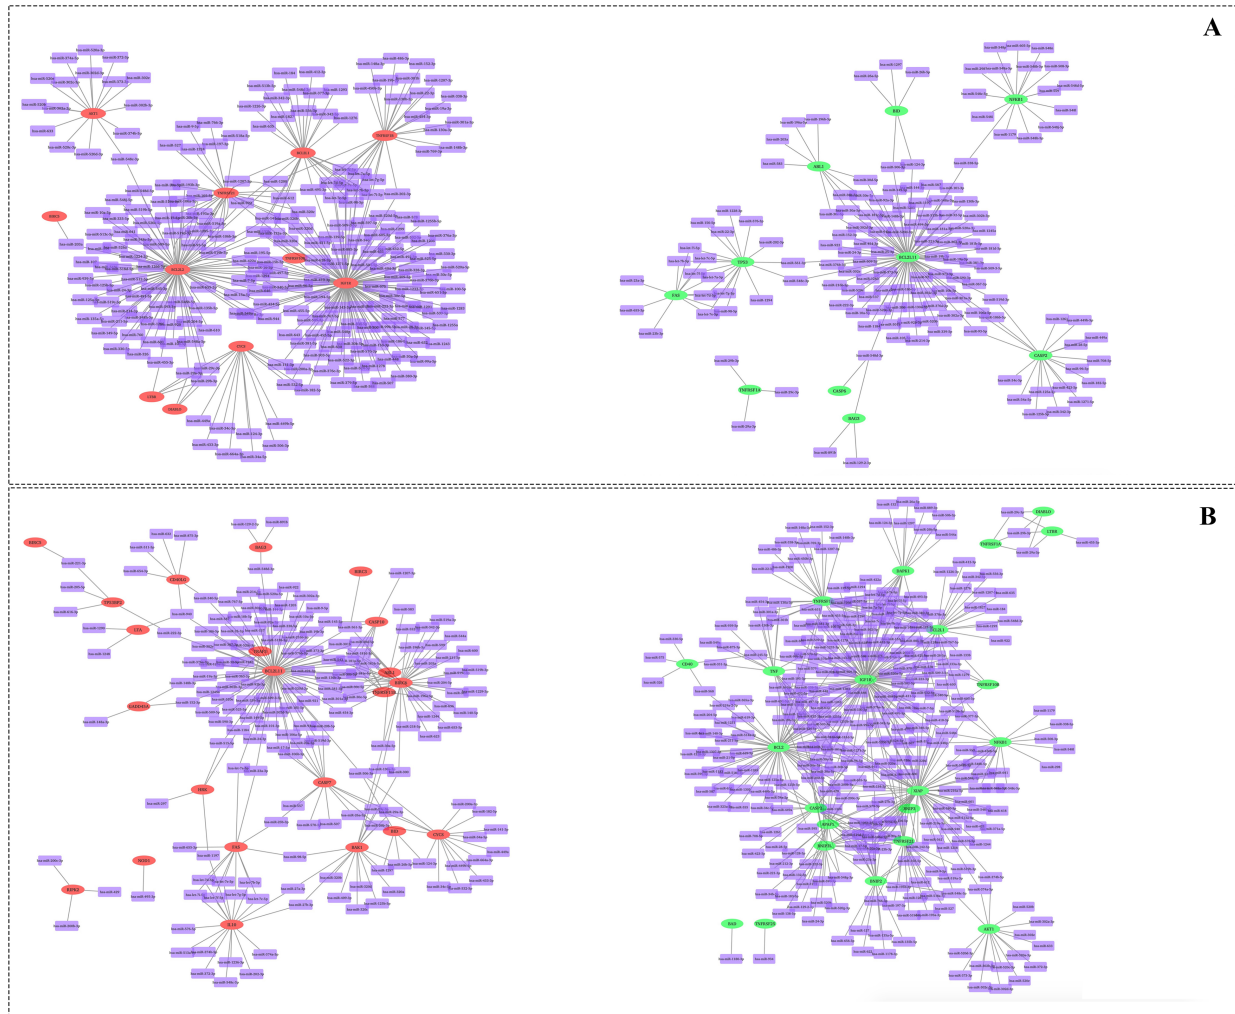

**Table S3.** Number of miRNAs targeting an individual gene in sample C exposed MCF-7 cells.

| Upregulated Genes in Sample C |                             |
|-------------------------------|-----------------------------|
| Gene names                    | Number of Associated miRNAs |
| AKT1                          | 16                          |
| BCL2L1                        | 29                          |
| BCL2L2                        | 86                          |
| BIRC5                         | 1                           |
| CYCS                          | 15                          |
| DIABLO                        | 3                           |
| IGF1R                         | 114                         |
| LTBR                          | 4                           |
| TNFRSF10B                     | 3                           |
| TNFRSF1B                      | 28                          |
| TNFRSF21                      | 27                          |

| Downregulated Genes in Sample C |                             |
|---------------------------------|-----------------------------|
| Gene Names                      | Number of Associated miRNAs |
| ABL1                            | 9                           |
| BAG3                            | 3                           |
| BCL2L11                         | 80                          |
| BID                             | 5                           |
| CASP2                           | 18                          |
| CASP6                           | 1                           |
| FAS                             | 12                          |
| NFKB1                           | 16                          |
| TNFRSF1A                        | 3                           |
| TP53                            | 17                          |

**Table S4.** Number of miRNAs targeting an individual gene in neviotin A-exposed MCF-7 cells.

| Upregulated Genes in Neviotine A |                             |
|----------------------------------|-----------------------------|
| Gene Names                       | Number of Associated miRNAs |
| ABL1                             | 9                           |
| BAG3                             | 3                           |
| BAK1                             | 17                          |
| BCL2L11                          | 83                          |
| BID                              | 5                           |
| BIRC3                            | 1                           |
| BIRC5                            | 1                           |
| BIRC6                            | 38                          |
| CASP10                           | 7                           |
| CASP7                            | 15                          |
| CD40LG                           | 6                           |
| CYCS                             | 15                          |
| FAS                              | 12                          |
| GADD45A                          | 3                           |
| HRK                              | 4                           |
| IL10                             | 18                          |
| LTA                              | 3                           |
| NOD1                             | 1                           |
| RIPK2                            | 3                           |
| TNFRSF11B                        | 5                           |
| TP53BP2                          | 4                           |
| TRAF3                            | 7                           |

| Downregulated Genes in Neviotine A |                             |
|------------------------------------|-----------------------------|
| Gene Names                         | Number of Associated miRNAs |
| AKT1                               | 16                          |
| APAF1                              | 20                          |
| BAD                                | 1                           |
| BCL2                               | 64                          |
| BCL2L1                             | 30                          |
| BNIP2                              | 20                          |
| BNIP3                              | 2                           |
| BNIP3L                             | 23                          |
| CASP2                              | 21                          |
| CD40                               | 5                           |
| DAPK1                              | 19                          |
| DIABLO                             | 3                           |
| IGF1R                              | 114                         |
| LTBR                               | 4                           |
| NFKB1                              | 17                          |
| TNF                                | 17                          |
| TNFRSF10B                          | 4                           |
| TNFRSF1A                           | 3                           |
| TNFRSF1B                           | 28                          |
| TNFRSF21                           | 26                          |
| TNFRSF25                           | 1                           |
| XIAP                               | 71                          |
